# Supplementary material for: Interaction of Bortezomib with Cell Membranes Regulates Its Toxicity and Resistance to Therapy
Source: MDPI journal article supplement (doi:10.3390/membranes12090823), 2022-08-23
Supplement: s1 [file s1]

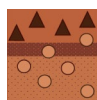

Supplementary material

# Interaction of Bortezomib with Cell Membranes Regulates Its Toxicity and Resistance to Therapy

Maria João Ramalho <sup>1,2,\*</sup>, Stéphanie Andrade <sup>1,2</sup>, Joana Angélica Loureiro <sup>1,2</sup> and Maria Carmo Pereira <sup>1,2,\*</sup>

<sup>1</sup> LEPABE—Laboratory for Process Engineering, Environment, Biotechnology and Energy, Faculty of Engineering, University of Porto, Rua Dr. Roberto Frias, 4200-465 Porto, Portugal

<sup>2</sup> ALiCE—Associate Laboratory in Chemical Engineering, Faculty of Engineering, University of Porto, Rua Dr. Roberto Frias, 4200-465 Porto, Portugal

\* Correspondence: mjr Ramalho@fe.up.pt (M.J.R.); mcsp@fe.up.pt (M.C.P.); Tel.: +351-22-508-2262 (M.J.R.); +351-22-508-1590 (M.C.P.)

**Table S1.** Physicochemical properties of the prepared LUVs. Results are given as mean  $\pm$  SD (n=3).

| LUVs         | pH  | Mean size (nm) | PdI             | Zeta Potential (mV) |
|--------------|-----|----------------|-----------------|---------------------|
| DMCP         | 7.4 | 122 $\pm$ 4    | 0.09 $\pm$ 0.04 | -0.3 $\pm$ 0.6      |
| DMPC:Chol:SM | 7.4 | 126 $\pm$ 9    | 0.08 $\pm$ 0.02 | 1.0 $\pm$ 0.3       |
| DMPC:Chol:SM | 6.5 | 123 $\pm$ 11   | 0.07 $\pm$ 0.01 | 0.5 $\pm$ 0.1       |
